## Acetylcholine Signaling Genes are Required for Cocaine-Stimulated Egg Laying in *Caenorhabditis elegans*

Soren Emerson<sup>1</sup>, Megan Hay<sup>2</sup>, Mark Smith<sup>1,3</sup>, David Blauch<sup>4</sup>, Nicole Snyder<sup>4</sup>, and Rachid El Bejjani<sup>1,2 †</sup>

Departments of <sup>1</sup>Neuroscience Interdisciplinary Program, <sup>2</sup>Biology, <sup>3</sup>Psychology, and <sup>4</sup>Chemistry, Davidson College, Davidson, North Carolina 28035

Despite the toxicity and addictive liability associated with cocaine abuse, its mode of action is not completely understood, and effective pharmacotherapeutic interventions remain elusive. The cholinergic effects of cocaine on acetylcholine receptors, synthetic enzymes, and degradative enzymes have been the focus of relatively little empirical investigation. Due to its genetic tractability and anatomical simplicity, the egg laying circuit of the hermaphroditic nematode, *Caenorhabditis elegans*, is a powerful model system to precisely examine the genetic and molecular targets of cocaine *in vivo*. Here, we report a novel cocaine-induced phenotype in *Caenorhabditis elegans*, cocaine-stimulated egg laying. In addition, we present the results of an *in vivo* candidate screen of synthetic enzymes, receptors, degradative enzymes, and downstream components of the intracellular signaling cascades of the main neurotransmitter systems that control *Caenorhabditis elegans* egg laying. Our results show that cocaine-stimulated egg laying is dependent on acetylcholine synthesis and synaptic release, functional nicotinic acetylcholine receptors, and the *Caenorhabditis elegans* acetylcholinesterases. Further, we show that cocaine-stimulated egg laying is not dependent on other neurotransmitters besides acetylcholine, including serotonin, dopamine, octopamine, and tyramine. Finally, our data show that cocaine-stimulated egg laying is increased in mutants for the *C. elegans* serotonin reuptake transporter as well as mutants for a 5-HT-gated chloride channel likely expressed in the locomotion circuit. Together, these results highlight serotonergic inhibition of egg laying behavior, functional connectivity between the egg laying and locomotion circuits in *Caenorhabditis elegans*, and possible discrete cholinergic and serotonergic effects of cocaine in the egg laying and locomotion circuits, respectively.

**Keywords:** Keywords: Cocaine, *Caenorhabditis elegans*, egg laying, acetylcholine, serotonin

† Corresponding author: raelbejjani@davidson.edu

## INTRODUCTION

Cocaine abuse is estimated to account for 900,000 cases of substance use disorder (1) and over 14,000 overdose deaths in the U.S. each year (2). Despite the impact of cocaine abuse on public health, there are no FDA-approved pharmacotherapeutic interventions for either the addictive liability or toxicity associated with cocaine abuse (3). A major impediment to the development of effective pharmacological interventions is the non-specificity of the drug, as pharmacodynamic interventions designed to block the canonical monoamine neurotransmitters implicated in the mode of action of cocaine dopamine (DA), serotonin (5-HT), and norepinephrine (4) have demonstrated limited efficacy in clinical trials (5). Elucidation of the full range of neurotransmitter systems and molecular effectors involved in the mode of action of cocaine could inform the development of novel pharmacotherapies.

A growing body of preclinical research demonstrates an important role for acetylcholine (ACh) in the pathology of cocaine use disorder. Cholinergic signaling influences multiple processes underlying reward and dependence in the mammalian brain, including learning and memory (6), attention (7), and motivation and reward (8). Pharmacological manipulation of cholinergic signaling alters responses in behavioral assays of cocaine reward such as self-administration (9,10), drug reinstatement (11), and conditioned place preference (12). To date, the vast majority of empirical examination of the effects of cocaine on ACh signaling has focused on the changes it induces in dopaminergic efflux (13); however, the direct impact of the drug on the molecular components of cholinergic signaling, including ACh synthetic enzymes, subtypes of nicotinic ACh receptors (nAChRs) and muscarinic ACh receptors

(mAChRs), and ACh degradative enzymes have been the focus of less empirical investigation, necessitating further examination of the direct effects of the drug on the cholinergic signaling.

The *Caenorhabditis elegans* egg laying circuit has served as a tractable genetic and molecular model for the mechanistic underpinnings of various neurotransmitters, including ACh (14) and biogenic amines, 5-HT, DA, octopamine (Oct), and tyramine (Tyr) (15). The circuit consists of two hermaphrodite-specific neurons (HSNs) (16) and six ventral type C neurons (VCs) (17), which innervate the 16 egg laying muscles (18).

ACh plays a crucial and complex role in regulating the egg laying behavior of *C. elegans* (19). The VCs, which are the primary cholinergic neurons in the egg laying circuit, innervate both the vulval muscles and the HSNs (17). Through discrete mechanisms, ACh chronically inhibits and acutely stimulates egg laying behavior. Binding of ACh to nAChRs on the vulval muscles induces their contraction and triggers egg laying (20,21) whereas binding of mAChRs on the HSNs by ACh reduces the release of 5-HT from these neurons, and thereby reduces egg laying (22).

Here we characterize a novel cocaine-induced behavior in *C. elegans*, cocaine-stimulated egg laying, and present pharmacological and genetic evidence for an ACh, nAChR, and (acetylcholinesterase) AChE-dependent mechanism of cocaine-stimulated *C. elegans* egg laying. Crucially, we show that the excitatory effect of cocaine on egg laying in *C. elegans* depends on genes involved in cholinergic neurotransmission, but not on genes involved in the other neurotransmitter systems within the egg laying circuit, including 5-HT, Oct, Tyr, and DA. In addition, we show that cocaine-stimulated egg laying is enhanced in mutants for the *C. elegans* SERT (*mod-5*) and a 5-HT-gated

chloride channel (*mod-1*), supporting a previously published report on the effect cocaine on *C. elegans* locomotion (23) and highlighting the connections between ACh, locomotion, and egg laying in *C. elegans*.

## RESULTS

### *ACh is the only neurotransmitter required for the stimulation of egg laying by cocaine in hypertonic medium*

In an effort to add to the current cocaine abuse models available in *C. elegans* (23–25), we set out to observe any strong phenotypes that may result from acute exposure of WT *C. elegans* to cocaine. Our initial observations determined that WT worms cultured on plates containing cocaine overnight showed several behavioral differences compared to untreated controls, including a previously reported modulation of locomotion (23). Specifically, preliminary experiments showed a reduction in the number of eggs in the uterus of WT hermaphrodite animals on plates containing cocaine. These initial observations and the amenability of *C. elegans* egg laying to pharmacological and genetic analysis led us to investigate the effect of cocaine on *C. elegans* egg laying behavior as a model for the genetic and molecular mediators of cocaine action using a quantitative approach.

We next quantified any differences in egg laying in *C. elegans* treated with cocaine by assaying induction of egg laying in liquid hypertonic medium, a well-established method previously used to investigate the stimulation of egg laying by 5-HT and pharmacological agents (16,26,27).

We show that treatment of WT *C. elegans* with cocaine significantly stimulates egg laying in hypertonic medium ( $6.334 \pm 2.193$ ) compared to parallel equimolar sucrose control ( $0.391 \pm 0.600$ ) ( $p < 0.0001$ ,  $N = 670$ ). These data confirm our initial observation and identify a robust assay for the genetic analysis of cocaine action in worms, cocaine-dependent egg laying.

We next used our newly described behavioral output to identify the main neurotransmitter systems involved in the egg laying response to cocaine. We screened the egg laying response of individual mutants lacking synthetic enzymes for each of the neurotransmitters previously implicated in egg laying (28). The genotypes tested include *tph-1(mg280)* (which encodes tryptophan hydroxylase required for 5-HT synthesis) (29), *tdc-1(n3419)* (which encodes tyrosine decarboxylase required for synthesis of Tyr) (30), *tbh-1(n3247)* (which encodes Tyr beta-hydroxylase required for synthesis of Oct) (15,27,30), *bas-1(ad446)* (which encodes an aromatic amino acid decarboxylase required for synthesis of 5-HT and DA) (15,31) and *cha-1(pp152)* (which encodes choline acetyltransferase necessary for ACh synthesis) (15,32–34).

We show that the choline acetyltransferase (*cha-1*) is required for cocaine-dependent egg laying (*cha-1(pp152)* mean =  $0.500 \pm 0.332$ ) vs (WT mean =  $4.82 \pm 1.782$ ) ( $p = 0.0079$ ,  $N = 50$ ) (**Fig. 1A**). Surprisingly, tryptophan hydroxylase (*tph-1*) is not required for cocaine-dependent stimulation of egg laying in hypertonic medium, suggesting that 5-HT, one of the main modulators of egg laying behavior, is not the primary target of cocaine in this model system (*tph-1(mg280)* mean =  $5.200 \pm 1.811$ ) vs (WT mean =  $7.147 \pm 2.216$ ) ( $p = 0.0952$ ,  $N = 50$ )

Additionally, aromatic amino acid decarboxylase mutants (*bas-1*), tyrosine decarboxylase mutants (*tdc-1*), and Tyr beta-hydroxylase mutants (*tbh-1*) do not exhibit a significant difference in egg laying response to cocaine as compared to WT, suggesting that Tyr, DA, and Oct may be ruled out as main targets of cocaine in this circuit (**Fig. 1C-E**).

#### *Cocaine-stimulated egg laying requires pre-synaptic Ach neurotransmission genes*

Suppression of the egg laying response to cocaine in choline acetyltransferase mutants (*cha-1*) suggests that presynaptic cholinergic neurotransmission is necessary for the egg laying response to the drug. To further examine this possibility, we assayed the egg laying of mutants for the transmembrane transporter necessary for packaging of ACh within synaptic vesicles during cholinergic neurotransmission (*unc-17*) (35). We found that the egg laying response of transmembrane transporter mutants to cocaine (*unc-17(e245)*) (mean =  $0.507 \pm 0.109$ ) is suppressed compared to parallel WT control (mean =  $5.380 \pm 1.293$ ) ( $p = 0.0079$ , N = 50) (**Fig. 2A**). The  $G\alpha_q$  ortholog *egl-30* is required for multiple neuronal functions, including ACh release from motor neurons (36). We show that the egg laying response to cocaine of  $G\alpha_q$  mutants (*egl-30(ad806)*) (mean =  $2.165 \pm 2.014$ ) is suppressed compared to parallel WT control (mean =  $5.933 \pm 0.778$ ) ( $p = 0.0159$ , N = 50) (**Fig. 2B**). Taken together, these results suggest that presynaptic ACh is required for the increased egg laying response to cocaine.

*Genes encoding nAChRs, but not mAChRs, are required for the egg laying response to cocaine*

To further understand the effect of cocaine on cholinergic signaling in the *C. elegans* egg laying circuit, we tested the egg laying response to cocaine in nAChR and mAChR mutants (*unc-29* and *unc-38*, respectively, encode a beta and an alpha subunit of nAChRs expressed on the vulval muscles) (21,28). Consistent with our finding that cholinergic neurotransmission is required for the egg laying response to cocaine, we show that cocaine-dependent egg laying is significantly reduced in *unc-29* mutants affecting the beta subunit nAChR; (*unc-29 (e1072)*) (mean =  $1.460 \pm 0.965$ ) vs WT control (mean =  $5.960 \pm 1.744$ ), ( $p = 0.0079$ ,  $N = 50$ ) (**Fig. 3A**). Similarly, the egg laying response to cocaine of alpha subunit nAChR mutants (*unc-38*) is suppressed compared to parallel WT control; (*unc-38(e264)*) (mean =  $3.760 \pm 1.176$ ) vs WT control (mean =  $6.460 \pm 1.835$ ) ( $p = 0.0238$ ,  $N = 50$ ) (**Fig. 3B**). These results suggest that nicotinic receptors expressed on the vulval muscle are required for molecular action of cocaine on egg laying behavior.

To determine if mAChRs are also required for molecular mechanism of cocaine-dependent egg laying, we assessed the response of mutants in the mAChR encoded by *gar-2* (22,28,37). We did not observe any difference in egg laying in *gar-2* mutants when compared to WT controls; (*gar-2(ok520)*) mean =  $3.860 \pm 0.581$ ) vs (WT mean =  $5.080 \pm 0.988$ ) ( $N = 50$ ) (**Fig. 3C**).

### *AChE-encoding genes are required for the egg laying response to cocaine*

AChEs catalyze the hydrolysis of ACh after its binding to cholinergic receptors on the postsynaptic membrane (38). Biochemical analysis has revealed multiple genes encoding *C. elegans* AChEs: *ace-1*, *ace-2*, *ace-3*, and *ace-4* (39). The AChEs encoded by *ace-1* and *ace-2* are the major hydrolytic enzymes of ACh whereas the AChE encoded by *ace-3* accounts for a minor proportion of AChE activity and the AChE encoded by *ace-4* is transcribed but does not result in a catalytically active protein

(19,39–42). In order to explore all aspects of the relationship between cocaine and cholinergic signaling in the egg laying response, we tested the egg laying response to cocaine in *ace-1;ace-2* and *ace-3;ace-4* double mutants. We found that *ace-1;ace-2* double mutants exhibit a suppressed egg laying response to cocaine (mean =  $0.2000 \pm 0.187$ ) compared to parallel WT control (mean =  $5.2200 \pm 2.649$ ) ( $p = 0.0079$ ,  $N = 50$ ) (**Fig. 4A**) whereas *ace-3;ace-4* double mutants exhibit an egg laying response to cocaine that does not differ significantly compared to parallel WT control (**Fig. 4B**).

### *Cocaine induces egg laying independently of 5-HT and of the HSNs*

ACh inhibits egg laying through the mAChRs (*gar-2*) expressed on the HSNs by reducing release of 5-HT from these neurons (19,22,28,43). Our results show that cocaine-dependent egg laying is not affected by a mutation in the mAChR encoded by *gar-2* (**Fig. 3C**). Additionally, HSN neurons are the main serotonergic neurons in the egg laying circuit, and our results suggest that serotonin is not required for the



stimulatory effects of cocaine on *C. elegans* egg laying behavior (**Fig. 1B-C**). Taken together, our data suggest that the mechanism may be independent of the HSN neurons and of the function of serotonin in the egg laying circuit.

To assess the role of HSN in cocaine-dependent egg laying, we quantified the egg laying response to cocaine in animals containing a semi-dominant mutation in the gene *egl-1* shown to trigger HSN cell death (44). We show that mutants lacking the serotonergic HSNs do not exhibit a significant difference in egg laying response to cocaine as compared to WT; (*egl-1(n487)* (mean =  $7.225 \pm 1.394$ ) vs WT control (mean =  $9.633 \pm 4.356$ ) ( $p = 0.0571$ ,  $N = 40$ ) (**Fig. 5A**). Our previous results suggest that the serotonergic HSN neurons are not required for cocaine-dependent egg laying but do not eliminate a post-synaptic mechanism requiring 5-HT receptors. We tested the egg laying response to cocaine in mutants with deficits in the four metabotropic 5-HT receptors expressed in the *C. elegans* egg laying circuit. The genotypes tested include *ser-5* (which encodes a  $G\alpha_s$ -coupled 5-HT receptor) (45), *ser-4* (which encodes an inhibitory  $G\alpha_o$ -coupled 5-HT receptor)(46), a *ser-1;ser-7* double mutant (which encode a  $G\alpha_q$ -coupled 5-HT receptor and  $G\alpha_s$ -coupled 5-HT receptor, respectively) (47,48). We show that the *ser-1;ser-7* double mutant and *ser-5*, and both exhibit an egg laying response to cocaine that does not differ significantly compared to their respective parallel WT controls, suggesting that the excitatory post-synaptic effects of 5-HT are not required for cocaine-dependent egg laying (**Fig. 5B and D**). Further, our data suggest cocaine does not stimulate egg laying by blocking the inhibitory effects of *ser-4* (**Fig. 5C**).

To investigate all aspects of serotonin neurotransmission, including the previously reported inhibitory effects, we examined whether cocaine-dependent egg laying requires *mod-1*, which encodes a 5-HT-gated chloride channel (49,50). We observed that *mod-1* is required for an inhibitory effect of cocaine, not detected in the WT; (*mod-1(ok103)* mean =  $18.398 \pm 3.153$ ) cocaine-dependent egg laying is increased compared to parallel WT control (mean =  $9.760 \pm 2.007$ ) ( $p = 0.0079$ , N = 50) (**Fig. 5E**). We also screened cocaine-stimulated egg laying in animals carrying a mutation in *mod-5* (which encodes the *C. elegans* SERT) (51). Notably, the egg laying response to cocaine of *mod-5* (mean =  $14.760 \pm 1.305$ ) is elevated compared to parallel WT control (mean =  $9.760 \pm 2.007$ ) ( $p = 0.0079$ , N = 50) (**Fig. 5F**). These results suggest that cocaine induces 5-HT-dependent inhibitory effects as well as ACh-dependent excitatory effects on egg laying.

## Discussion

Despite the severe toxicity and addictive liability associated with cocaine abuse (1,52), its mode of action is not sufficiently understood to produce effective pharmacotherapeutic interventions (5). ACh plays an important role in the mode of action of cocaine (13), but examination of the direct effects of the drug on cholinergic signaling is lacking. Here we present a previously unreported cocaine-induced behavioral phenotype in *C. elegans*, cocaine-stimulated egg laying, and through a candidate screen of individual molecular effectors in the egg laying circuit show that this

phenotype is dependent on ACh signaling genes, namely, *unc-29*, *unc-38*, *unc-17*, *egl-30*, *ace-1* and *ace-2*, and *cha-1*.

Multiple lines of evidence presented in this paper point to the conclusion that cocaine stimulates *C. elegans* egg laying through an ACh, nAChR, and AChE-dependent mechanism. First, animals with deficits in the synthesis of ACh by choline acetyltransferase (*cha-1*) and vesicular packaging of ACh by the transmembrane ACh transporter (*unc-17*) exhibit a suppressed egg laying response to cocaine compared to their respective parallel WT controls whereas animals with deficits in serotonergic (*tph-1*), dopaminergic (*bas-1*), octopaminergic (*tbh-1*), or tyraminerbic (*tdc-1*) neurotransmission exhibit an egg laying response to cocaine that is not significantly different compared to their respective parallel WT controls. Second, animals with deficits in nAChRs expressed on the vulval muscles (*unc-29* and *unc-38*) also exhibit a suppressed egg laying response to cocaine compared to their respective parallel WT controls whereas animals with deficits in HSN-expressed mAChR (*gar-2*) exhibit an egg laying response to cocaine that is not significantly different from parallel WT control. Third, the *C. elegans* AChEs encoded by *ace-1* and *ace-2* are required for cocaine-stimulated egg laying.

In addition, our data show that cocaine-stimulated egg laying is increased in mutants for the *C. elegans* 5-HT reuptake transporter (SERT) (*mod-5*), as well as 5-HT-gated chloride channel mutants (*mod-1*), highlighting serotonergic inhibition of egg laying behavior as a consequence of a connection between the *C. elegans* egg laying and locomotion circuits.

## **Cocaine-induced egg laying in *C. elegans* is dependent on stimulation of nAChRs and *C. elegans* AChEs**

The functional role of ACh in *C. elegans* egg laying is complex, as it has both an acute excitatory effect (21) and a chronic inhibitory effect (22). The acute excitatory effect of ACh on egg laying is the result of stimulation of nAChRs expressed on the vulval muscles, as nicotinic agonists stimulate egg laying (53,54), but fail to do so in the absence of vulval muscle expression of genes encoding nAChRs (55). The chronic inhibitory effect of ACh on egg laying is a result of negative feedback from the VCs to the HSNs, via the HSN-expressed mAChR encoded by *gar-2* (22).

Our finding that the egg laying response to cocaine is suppressed in animals with deficits in presynaptic cholinergic neurotransmission (*unc-17* and *cha-1*), as well as postsynaptic deficits in nAChRs (*unc-29* and *unc-38*), but not in animals with functional deficits in other neurotransmitter signaling pathways, suggests that nicotinic cholinergic neurotransmission plays a key role in cocaine-stimulated egg laying.

### **Interaction between the effect of cocaine on locomotion and egg laying**

Our study did not identify any genes involved in serotonergic neurotransmission that are required for the stimulatory effects of cocaine on *C. elegans* egg laying; however, we did observe a statistically significant increase in the egg laying response to cocaine in two serotonergic mutants, including 5-HT-gated chloride channel mutants (*mod-1*) and SERT mutants (*mod-5*).

We propose that the increased egg laying response to cocaine in these mutants may result from interaction between the egg laying and locomotion circuits. Ratiometric calcium imaging of the egg laying circuit shows active and inactive phases that are coordinated with locomotion (20,56,57). In addition to stimulating egg laying through nAChRs expressed on the vulval muscles (19,21,22,28), the VCs slow locomotion preceding egg laying events through cholinergic synaptic contacts with the body wall muscles (20), which is thought hold to the body of the worm in a position that is conducive to egg laying and allow sufficient time for contraction of the vulval muscles. MOD-1 and MOD-5 have been suggested to play an inhibitory role in *C. elegans* egg laying behavior through inhibition of interneurons in the locomotion circuit, which subsequently decrease the activity of the egg laying neurons (45). Notably, cocaine induces a decrease in locomotion speed in *C. elegans* that is dependent on *mod-1* and *mod-5* (23). These results align well with our (**Fig. E-F**) data showing an increased egg laying response in *mod-1(ok103)* and *mod-5(n3314)* mutants compared to WT and suggest that cocaine may have both serotonergic and cholinergic effects on the locomotion and egg laying circuits, respectively.

Finally, we did not observe a change in egg laying in *tph-1(mg280)* and *bas-1(ad446)* mutant animals which are resistant to the slowing of locomotion speed induced by cocaine (23), potentially suggesting egg laying circuit plasticity in the absence of these enzymes during development.

## Cocaine stimulates egg laying independently of HSN and serotonin

Cocaine stimulates egg laying in *C. elegans* independently of serotonergic neurotransmission as neither the HSNs (*egl-1*), 5-HT receptors (*ser-1*; *ser-7*, *ser-4*, *mod-1*), 5-HT synthetic enzymes (*tph-1* and *bas-1*), nor the *C. elegans* SERT (*mod-5*) are required for stimulation of egg laying by cocaine.

A possible explanation for HSN-independent nAChR-dependent stimulation of egg laying by cocaine is silencing of the VCs and HSNs by high osmotic pressure (20,58). The HSNs and the VCs each play a related, but distinct, role in the stimulation of *C. elegans* egg laying through their neuromuscular innervation of the vulval muscles. 5-HT, released from the HSNs, modulates activity of the vulval muscles by increasing the frequency of spontaneous calcium transits (59). Conversely, ACh, released from the VCs, triggers individual egg laying events by stimulating nAChRs and thereby inducing muscle contraction (14). The activity of both the VCs and the HSNs is depressed under conditions of high osmolarity (20,58); however, the vulval muscles innervated by these motor neurons retain a significant level of activity as measured by calcium transits (58). Therefore, under the high osmolarity conditions in which our egg laying assays were performed, the osmotic silencing of the HSNs and the VCs may be sufficient to negate inhibitory cholinergic feedback while at the same time preserving the potential for nicotinic stimulation of individual egg laying events.

## EXPERIMENTAL PROCEDURES

### Nematode strains

The WT strain was Bristol N2. The following mutant alleles were used in this study:

MT15434: *tph-1(mg280)*; MT13113: *tdc-1(n3419)*; MT9455: *tbh-1(n3247)*; MT7988: *bas-1(ad446)*; PR1152: *cha-1(p1152)*; CB933: *unc-17(e245)*; CB1072: *unc-29(e1072)*; CB904: *unc-38(e264)*; RB756: *gar-2(ok520)*; GG201: *ace-1(p1000)*; *ace-2(g72)*; PR1300: *ace-3*; *ace-4(dc2)*; MT1082: *egl-1(n487)*; DA1084: *egl-30(ad806)*, DA2109: *ser-1(ok345)*; *ser-7(tm1325)*; MT9668: *mod-1(ok103)*; MT9772: *mod-5(n3314)*; RB2277: *ser-5(ok3087)*; AQ866: *ser-4(ok512)*. Animals were maintained on NGM agar plates with *E. coli* OP50 as a source of food (60). Temperature was controlled at 20 °C.

### Egg laying assays and statistical analysis

Egg laying assays were performed according to a protocol by Moresco and Koelle (61). In this study, the egg laying behavior of *C. elegans* hermaphrodites in hypertonic M9 salt solution, which strongly inhibits egg laying in otherwise untreated WT animals (27), was quantified. For each experiment, an aqueous stock solution of cocaine hydrochloride was diluted to the treatment concentration in M9 buffer solution with an equal volume of equimolar aqueous sucrose solution or 5-HT diluted in M9 buffer solution in each of the control conditions. Late stage L4 hermaphrodites of the respective strains were picked ~24 hours before assaying and continued to be cultured on agar plates with an OP50 lawn at 20°C. Day one adult hermaphrodites were isolated into single wells on a 96-well plate containing 35 µl experimental or equimolar control

solutions. After 60 mins, each well was examined, and the number of eggs laid by each animal was recorded. The investigators were blind to both the identity of the treatment solution and the genotype. Each experiment included ten subjects per experimental or control group unless otherwise indicated and each experiment was independently repeated four or five times as indicated. The mean number of eggs laid by each of the replicate treatment groups was treated as a single data point. Statistical analysis was performed using a Mann-Whitney U-test.

### **Data Availability Statement**

The authors affirm that all data necessary for confirming the conclusions of this article are represented fully within the article and its tables and figures.

### **Chemicals**

Aqueous cocaine hydrochloride was supplied by the National Institute on Drug Abuse (Research Triangle Institute, Research Triangle Park, NC, USA). Serotonin hydrochloride was purchased from Sigma Chemical Co. (St. Louis, MO).



## Acknowledgments

This work was supported by NIH Grants DA045364, DA031725, and DA045714. The NIH had no role in the writing of the manuscript or in the decision to submit the manuscript for publication. Some strains were provided by the *Caenorhabditis* Genetics Center (CGC), which is funded by National Institutes of Health Office of Research Infrastructure Programs (P40 OD010440). S.E. was supported by the R. Craig and Sheila Yoder Applied Research Fellowship (<https://www.davidson.edu/academics/research/undergraduate-research/r-craig-and-sheila-yoder-applied-research-fellowship>), the Davidson Research Initiative (<https://www.davidson.edu/academics/research/undergraduate-research/davidson-research-initiative>) and the Faculty Study and Research Grant from Davidson College (<https://www.davidson.edu/academics/research/faculty-research/faculty-funding-opportunities-research>). The authors have declared that no competing interests exist.

## REFERENCES:

1. Lipari RN, Van Horn SL. Trends in Substance Use Disorders Among Adults Aged 18 or Older. In: The CBHSQ Report [Internet]. Rockville (MD): Substance Abuse and Mental Health Services Administration (US); 2013 [cited 2020 Sep 1]. Available from: <http://www.ncbi.nlm.nih.gov/books/NBK447253/>
2. Hedegaard H, Spencer MR, Garnett M. Increase in Drug Overdose Deaths Involving Cocaine: United States, 2009–2018. 2020;(384):8.
3. Kampman KM. The treatment of cocaine use disorder. *Sci Adv* [Internet]. 2019 Oct 16 [cited 2020 Sep 1];5(10). Available from: <https://www.ncbi.nlm.nih.gov/pmc/articles/PMC6795516/>
4. Pitts DK, Marwah J. Autonomic actions of cocaine. *Can J Physiol Pharmacol*. 1989 Sep;67(9):1168–76.
5. Czoty PW, Stoops WW, Rush CR. Evaluation of the “Pipeline” for Development of Medications for Cocaine Use Disorder: A Review of Translational Preclinical, Human Laboratory, and Clinical Trial Research. *Pharmacol Rev*. 2016 Jul;68(3):533–62.
6. Hasselmo ME. The Role of Acetylcholine in Learning and Memory. *Curr Opin Neurobiol*. 2006 Dec;16(6):710–5.
7. Klinkenberg I, Sambeth A, Blokland A. Acetylcholine and attention. *Behav Brain Res*. 2011 Aug 10;221(2):430–42.
8. Sofuoglu M, Mooney M. Cholinergic Functioning in Stimulant Addiction: Implications for Medications Development. *CNS Drugs*. 2009 Nov 1;23(11):939–52.
9. de la Garza R, Johanson CE. Effects of haloperidol and physostigmine on self-administration of local anesthetics. *Pharmacol Biochem Behav*. 1982;17(6):1295–9.
10. Wilson MC, Schuster CR. Cholinergic influence on intravenous cocaine self-administration by rhesus monkeys. *Pharmacol Biochem Behav*. 1973 Dec;1(6):643–9.
11. See RE, McLaughlin J, Fuchs RA. Muscarinic receptor antagonism in the basolateral amygdala blocks acquisition of cocaine-stimulus association in a model of relapse to cocaine-seeking behavior in rats. *Neuroscience*. 2003;117(2):477–83.
12. Hikida T, Kitabatake Y, Pastan I, Nakanishi S. Acetylcholine enhancement in the nucleus accumbens prevents addictive behaviors of cocaine and morphine. *Proc Natl Acad Sci U S A*. 2003 May 13;100(10):6169–73.

13. Williams MJ, Adinoff B. The role of acetylcholine in cocaine addiction. *Neuropsychopharmacol Off Publ Am Coll Neuropsychopharmacol*. 2008 Jul;33(8):1779–97.
14. Schafer W. Egg-laying. *WormBook* [Internet]. 2005 [cited 2019 Aug 19]; Available from: [http://www.wormbook.org/chapters/www\\_egglaying/egglaying.html](http://www.wormbook.org/chapters/www_egglaying/egglaying.html)
15. Chase D. Biogenic amine neurotransmitters in *C. elegans*. *WormBook* [Internet]. 2007 [cited 2020 Apr 15]; Available from: [http://www.wormbook.org/chapters/www\\_monoamines/monoamines.html](http://www.wormbook.org/chapters/www_monoamines/monoamines.html)
16. Desai C, Garriga G, McIntire SL, Horvitz HR. A genetic pathway for the development of the *Caenorhabditis elegans* HSN motor neurons. *Nature*. 1988 Dec;336(6200):638–46.
17. White JG, Southgate E, Thomson JN, Brenner S. The structure of the nervous system of the nematode *Caenorhabditis elegans*. *Philos Trans R Soc Lond B Biol Sci*. 1986 Nov 12;314(1165):1–340.
18. Sulston JE, Horvitz HR. Post-embryonic cell lineages of the nematode, *Caenorhabditis elegans*. *Dev Biol*. 1977 Mar;56(1):110–56.
19. Rand J. Acetylcholine. *WormBook* [Internet]. 2007 [cited 2020 Apr 15]; Available from: [http://www.wormbook.org/chapters/www\\_acetylcholine/acetylcholine.html](http://www.wormbook.org/chapters/www_acetylcholine/acetylcholine.html)
20. Collins KM, Bode A, Fernandez RW, Tanis JE, Brewer JC, Creamer MS, et al. Activity of the *C. elegans* egg-laying behavior circuit is controlled by competing activation and feedback inhibition [Internet]. *eLife*. eLife Sciences Publications Limited; 2016 [cited 2020 Jul 9]. Available from: <https://elifesciences.org/articles/21126>
21. Kim J, Poole DS, Waggoner LE, Kempf A, Ramirez DS, Treschow PA, et al. Genes affecting the activity of nicotinic receptors involved in *Caenorhabditis elegans* egg-laying behavior. *Genetics*. 2001 Apr;157(4):1599–610.
22. Bany IA, Dong M-Q, Koelle MR. Genetic and cellular basis for acetylcholine inhibition of *Caenorhabditis elegans* egg-laying behavior. *J Neurosci Off J Soc Neurosci*. 2003 Sep 3;23(22):8060–9.
23. Ward A, Walker VJ, Feng Z, Xu XZS. Cocaine Modulates Locomotion Behavior in *C. elegans*. *PLOS ONE*. 2009 Jun 17;4(6):e5946.
24. Engleman EA, Katner SN, Neal-Beliveau BS. *Caenorhabditis elegans* as a Model to Study the Molecular and Genetic Mechanisms of Drug Addiction. *Prog Mol Biol Transl Sci*. 2016;137:229–52.
25. Engleman EA, Steagall KBI, Bredhold KE, Breach M, Kline HL, Bell RL, et al. *Caenorhabditis elegans* Show Preference for Stimulants and Potential as a Model

- Organism for Medications Screening. *Front Physiol* [Internet]. 2018 [cited 2019 Sep 2];9. Available from: <https://www.frontiersin.org/articles/10.3389/fphys.2018.01200/full>
26. Dempsey CM, Mackenzie SM, Gargus A, Blanco G, Sze JY. Serotonin (5HT), Fluoxetine, Imipramine and Dopamine Target Distinct 5HT Receptor Signaling to Modulate *Caenorhabditis elegans* Egg-Laying Behavior. *Genetics*. 2005 Mar;169(3):1425–36.
  27. Horvitz HR, Chalfie M, Trent C, Sulston JE, Evans PD. Serotonin and octopamine in the nematode *Caenorhabditis elegans*. *Science*. 1982 May 28;216(4549):1012–4.
  28. Schafer WR. Genetics of Egg-Laying in Worms. *Annu Rev Genet*. 2006;40(1):487–509.
  29. Sze JY, Victor M, Loer C, Shi Y, Ruvkun G. Food and metabolic signalling defects in a *Caenorhabditis elegans* serotonin-synthesis mutant. *Nature*. 2000 Feb 3;403(6769):560–4.
  30. Alkema MJ, Hunter-Ensor M, Ringstad N, Horvitz HR. Tyramine Functions Independently of Octopamine in the *Caenorhabditis elegans* Nervous System. *Neuron*. 2005 Apr;46(2):247–60.
  31. Hare EE, Loer CM. Function and evolution of the serotonin-synthetic *bas-1* gene and other aromatic amino acid decarboxylase genes in *Caenorhabditis*. *BMC Evol Biol*. 2004 Aug 2;4:24.
  32. Rand JB, Russell RL. Properties and Partial Purification of Choline Acetyltransferase from the Nematode *Caenorhabditis elegans*. *J Neurochem*. 1985;44(1):189–200.
  33. Rand JB, Russell RL. Choline acetyltransferase-deficient mutants of the nematode *Caenorhabditis elegans*. *Genetics*. 1984 Feb;106(2):227–48.
  34. Alfonso A, Grundahl K, McManus JR, Rand JB. Cloning and characterization of the choline acetyltransferase structural gene (*cha-1*) from *C. elegans*. *J Neurosci Off J Soc Neurosci*. 1994 Apr;14(4):2290–300.
  35. Alfonso A, Grundahl K, Duerr JS, Han HP, Rand JB. The *Caenorhabditis elegans* *unc-17* gene: a putative vesicular acetylcholine transporter. *Science*. 1993 Jul 30;261(5121):617–9.
  36. Lackner MR, Nurrish SJ, Kaplan JM. Facilitation of Synaptic Transmission by EGL-30 Gq $\alpha$  and EGL-8 PLC $\beta$ : DAG Binding to UNC-13 Is Required to Stimulate Acetylcholine Release. *Neuron*. 1999 Oct 1;24(2):335–46.

37. Lee YS, Park YS, Nam S, Suh SJ, Lee J, Kaang BK, et al. Characterization of GAR-2, a novel G protein-linked acetylcholine receptor from *Caenorhabditis elegans*. *J Neurochem*. 2000 Nov;75(5):1800–9.
38. Dvir H, Silman I, Harel M, Rosenberry TL, Sussman JL. Acetylcholinesterase: From 3D Structure to Function. *Chem Biol Interact*. 2010 Sep 6;187(1–3):10–22.
39. Combes D, Fedon Y, Toutant JP, Arpagaus M. Acetylcholinesterase genes in the nematode *Caenorhabditis elegans*. *Int Rev Cytol*. 2001;209:207–39.
40. Johnson CD, Russell RL. Multiple Molecular Forms of Acetylcholinesterase in the Nematode *Caenorhabditis elegans*. *J Neurochem*. 1983;41(1):30–46.
41. Kolson DL, Russell RL. A novel class of acetylcholinesterase, revealed by mutations, in the nematode *Caenorhabditis elegans*. *J Neurogenet*. 1985 Apr;2(2):93–110.
42. Arpagaus M, Combes D, Culetto E, Grauso M, Fedon Y, Romani R, et al. Four acetylcholinesterase genes in the nematode *Caenorhabditis elegans*. *J Physiol Paris*. 1998 Dec;92(5–6):363–7.
43. Ringstad N, Horvitz HR. FMRFamide neuropeptides and acetylcholine synergistically inhibit egg-laying by *C. elegans*. *Nat Neurosci*. 2008 Oct;11(10):1168–76.
44. Conradt B, Horvitz HR. The *C. elegans* Protein EGL-1 Is Required for Programmed Cell Death and Interacts with the Bcl-2-like Protein CED-9. *Cell*. 1998 May;93(4):519–29.
45. Hapiak VM, Hobson RJ, Hughes L, Smith K, Harris G, Condon C, et al. Dual Excitatory and Inhibitory Serotonergic Inputs Modulate Egg Laying in *Caenorhabditis elegans*. *Genetics*. 2009 Jan;181(1):153–63.
46. Olde B, McCombie WR. Molecular cloning and functional expression of a serotonin receptor from *Caenorhabditis elegans*. *J Mol Neurosci*. 1997 Feb 1;8(1):53–62.
47. Carnell L, Illi J, Hong SW, McIntire SL. The G-Protein-Coupled Serotonin Receptor SER-1 Regulates Egg Laying and Male Mating Behaviors in *Caenorhabditis elegans*. *J Neurosci*. 2005 Nov 16;25(46):10671–81.
48. Hobson RJ, Hapiak VM, Xiao H, Buehrer KL, Komuniecki PR, Komuniecki RW. SER-7, a *Caenorhabditis elegans* 5-HT7-like Receptor, Is Essential for the 5-HT Stimulation of Pharyngeal Pumping and Egg Laying. *Genetics*. 2006 Jan 1;172(1):159–69.
49. Gürel G, Gustafson MA, Pepper JS, Horvitz HR, Koelle MR. Receptors and Other Signaling Proteins Required for Serotonin Control of Locomotion in *Caenorhabditis elegans*. *Genetics*. 2012 Dec;192(4):1359–71.

50. Ranganathan R, Cannon SC, Horvitz HR. MOD-1 is a serotonin-gated chloride channel that modulates locomotory behaviour in *C. elegans*. *Nature*. 2000 Nov 23;408(6811):470–5.
51. Ranganathan R, Sawin ER, Trent C, Horvitz HR. Mutations in the *Caenorhabditis elegans* serotonin reuptake transporter MOD-5 reveal serotonin-dependent and -independent activities of fluoxetine. *J Neurosci Off J Soc Neurosci*. 2001 Aug 15;21(16):5871–84.
52. Kariisa M. Drug Overdose Deaths Involving Cocaine and Psychostimulants with Abuse Potential — United States, 2003–2017. *MMWR Morb Mortal Wkly Rep* [Internet]. 2019 [cited 2020 Jan 1];68. Available from: <https://www.cdc.gov/mmwr/volumes/68/wr/mm6817a3.htm>
53. Trent C, Tsuing N, Horvitz HR. Egg-laying defective mutants of the nematode *Caenorhabditis elegans*. *Genetics*. 1983 Aug;104(4):619–47.
54. Weinschenker D, Garriga G, Thomas JH. Genetic and pharmacological analysis of neurotransmitters controlling egg laying in *C. elegans*. *J Neurosci*. 1995 Oct 1;15(10):6975–85.
55. Waggoner LE, Dickinson KA, Poole DS, Tabuse Y, Miwa J, Schafer WR. Long-Term Nicotine Adaptation in *Caenorhabditis elegans* Involves PKC-Dependent Changes in Nicotinic Receptor Abundance. *J Neurosci*. 2000 Dec 1;20(23):8802–11.
56. Chew YL, Grundy LJ, Brown AEX, Beets I, Schafer WR. Neuropeptides encoded by *nlp-49* modulate locomotion, arousal and egg-laying behaviours in *Caenorhabditis elegans* via the receptor SEB-3. *Philos Trans R Soc B Biol Sci*. 2018 Oct 19;373(1758):20170368.
57. Collins KM, Koelle MR. Postsynaptic ERG Potassium Channels Limit Muscle Excitability to Allow Distinct Egg-Laying Behavior States in *Caenorhabditis elegans*. *J Neurosci*. 2013 Jan 9;33(2):761–75.
58. Zhang M, Chung SH, Fang-Yen C, Craig C, Kerr RA, Suzuki H, et al. A self-regulating feed-forward circuit controlling *C. elegans* egg-laying behavior. *Curr Biol CB*. 2008 Oct 14;18(19):1445–55.
59. Shyn SI, Kerr R, Schafer WR. Serotonin and Go Modulate Functional States of Neurons and Muscles Controlling *C. elegans* Egg-Laying Behavior. *Curr Biol*. 2003 Oct 28;13(21):1910–5.
60. Stiernagle T. Maintenance of *C. elegans*. *WormBook* [Internet]. 2006 [cited 2020 Jul 30]; Available from: [http://www.wormbook.org/chapters/www\\_strainmaintain/strainmaintain.html](http://www.wormbook.org/chapters/www_strainmaintain/strainmaintain.html)

61. Hart A. Behavior. WormBook [Internet]. 2006 [cited 2018 Dec 8]; Available from: [http://www.wormbook.org/chapters/www\\_behavior/behavior.html](http://www.wormbook.org/chapters/www_behavior/behavior.html)

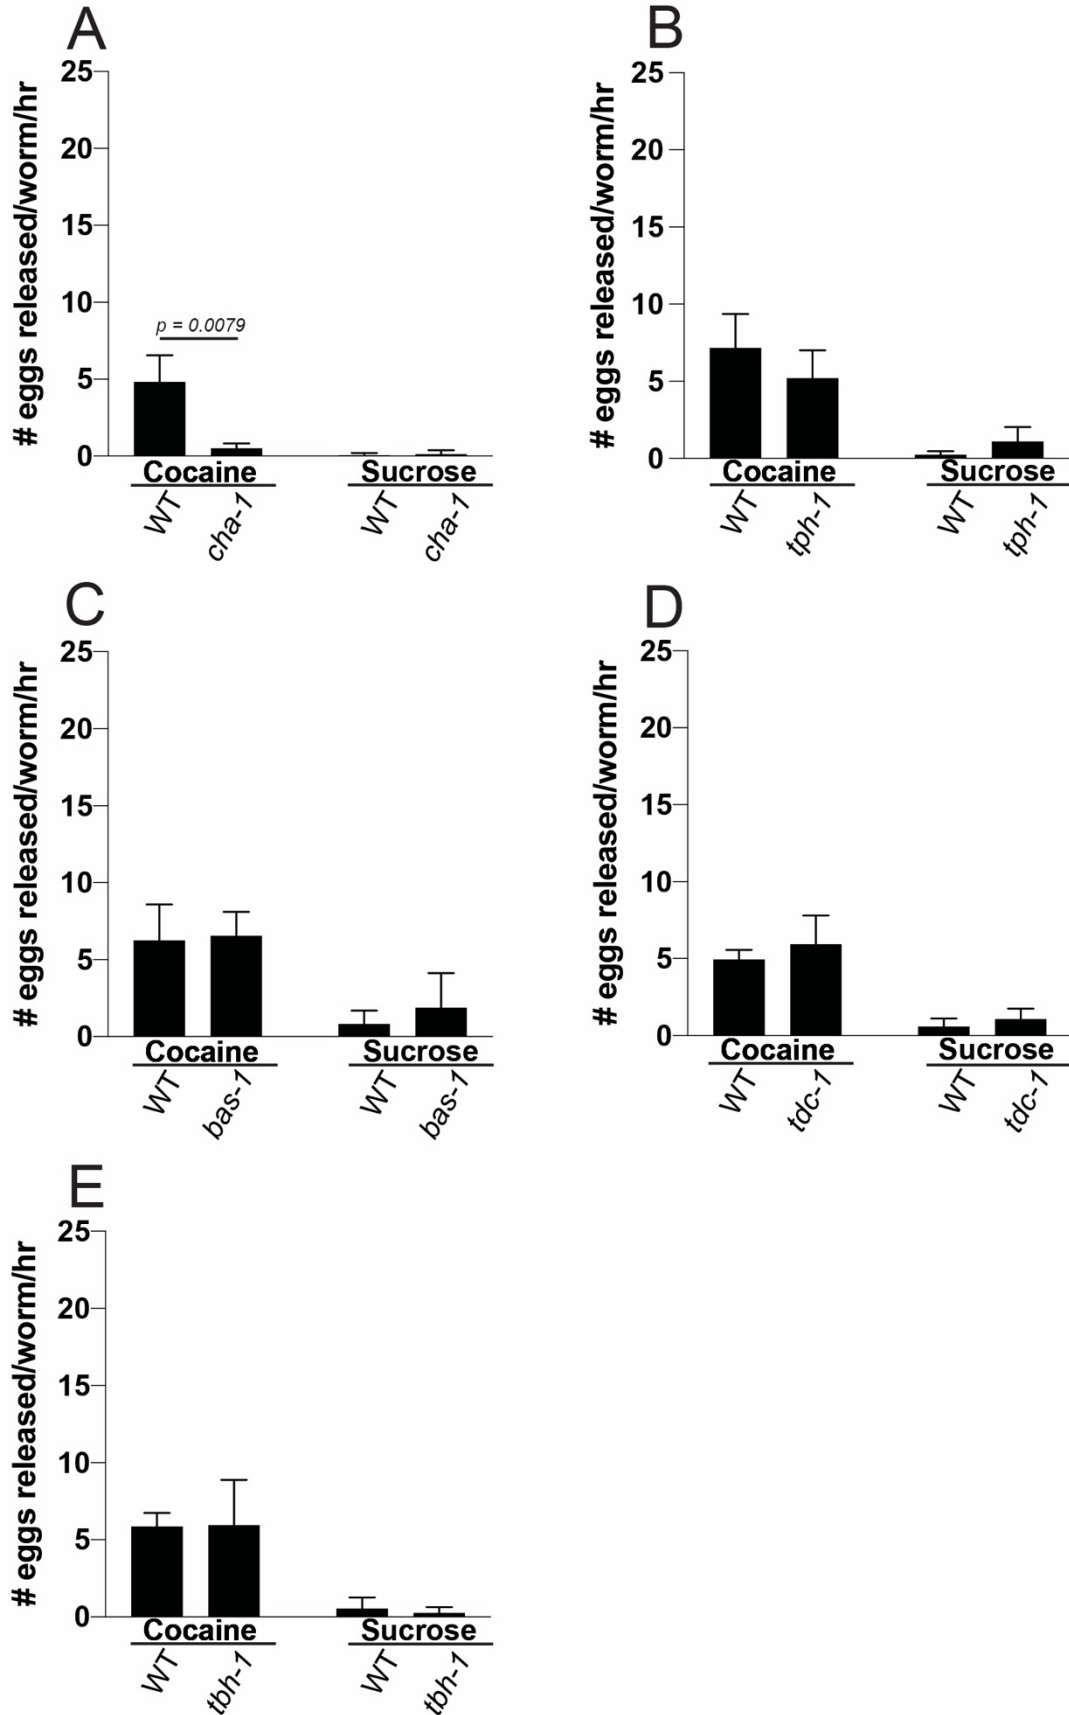



**Fig 1: Choline acetyltransferase is required for the egg laying response to cocaine.** Egg laying behavior of **A.** *cha-1*, **B.** *tph-1*, **C.** *bas-1*, **D.** *tdc-1*, and **E.** *tbh-1* in 62.5 mM cocaine or a 62.5 mM sucrose control compared to WT. We performed 5 independent experiments with 10 animals in each group. Relevant p values shown for significant differences. Error bars represent SD. Significance as compared to WT control was determined via a Mann-Whitney U-test.

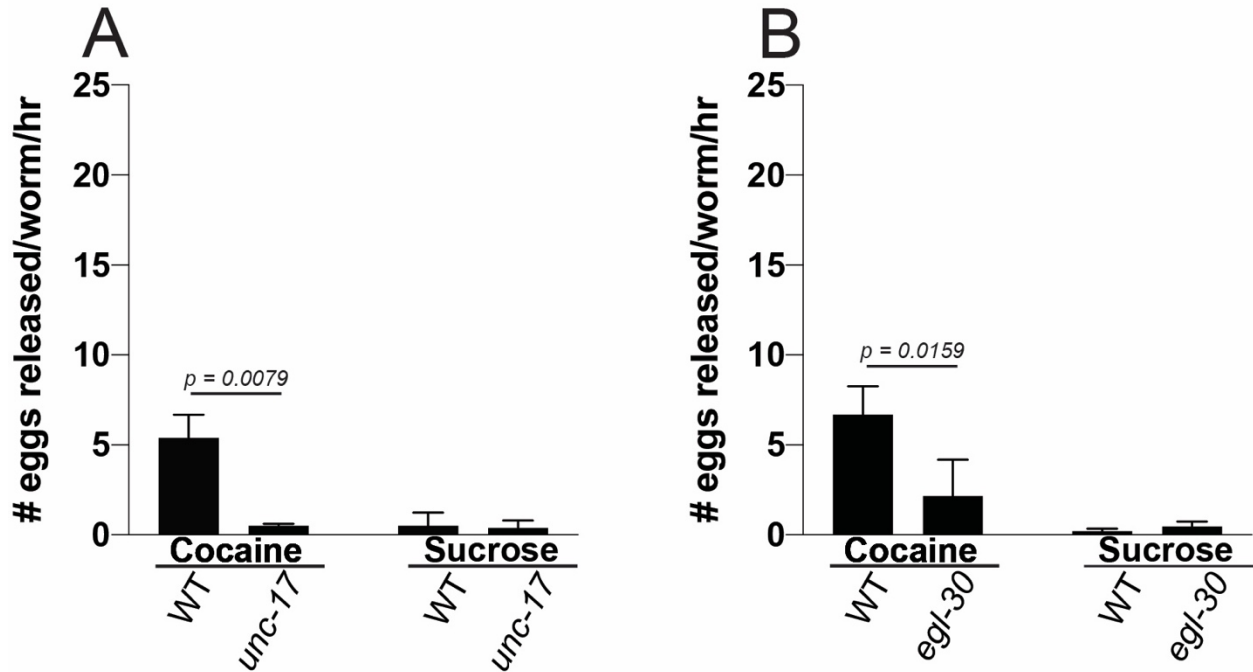

**Fig 2: The ACh transmembrane transporter and  $G\alpha_q$  are required for the egg laying response to cocaine.** **A.** Egg laying behavior of **A.** *unc-17* and **B.** *egl-30* in 62.5 mM cocaine or a 62.5 mM sucrose control compared to WT. We performed 5 independent experiments with 10 animals in each group. Relevant p values shown for significant differences. Error bars represent SD. Significance as compared to WT control was determined via a Mann-Whitney U-test.

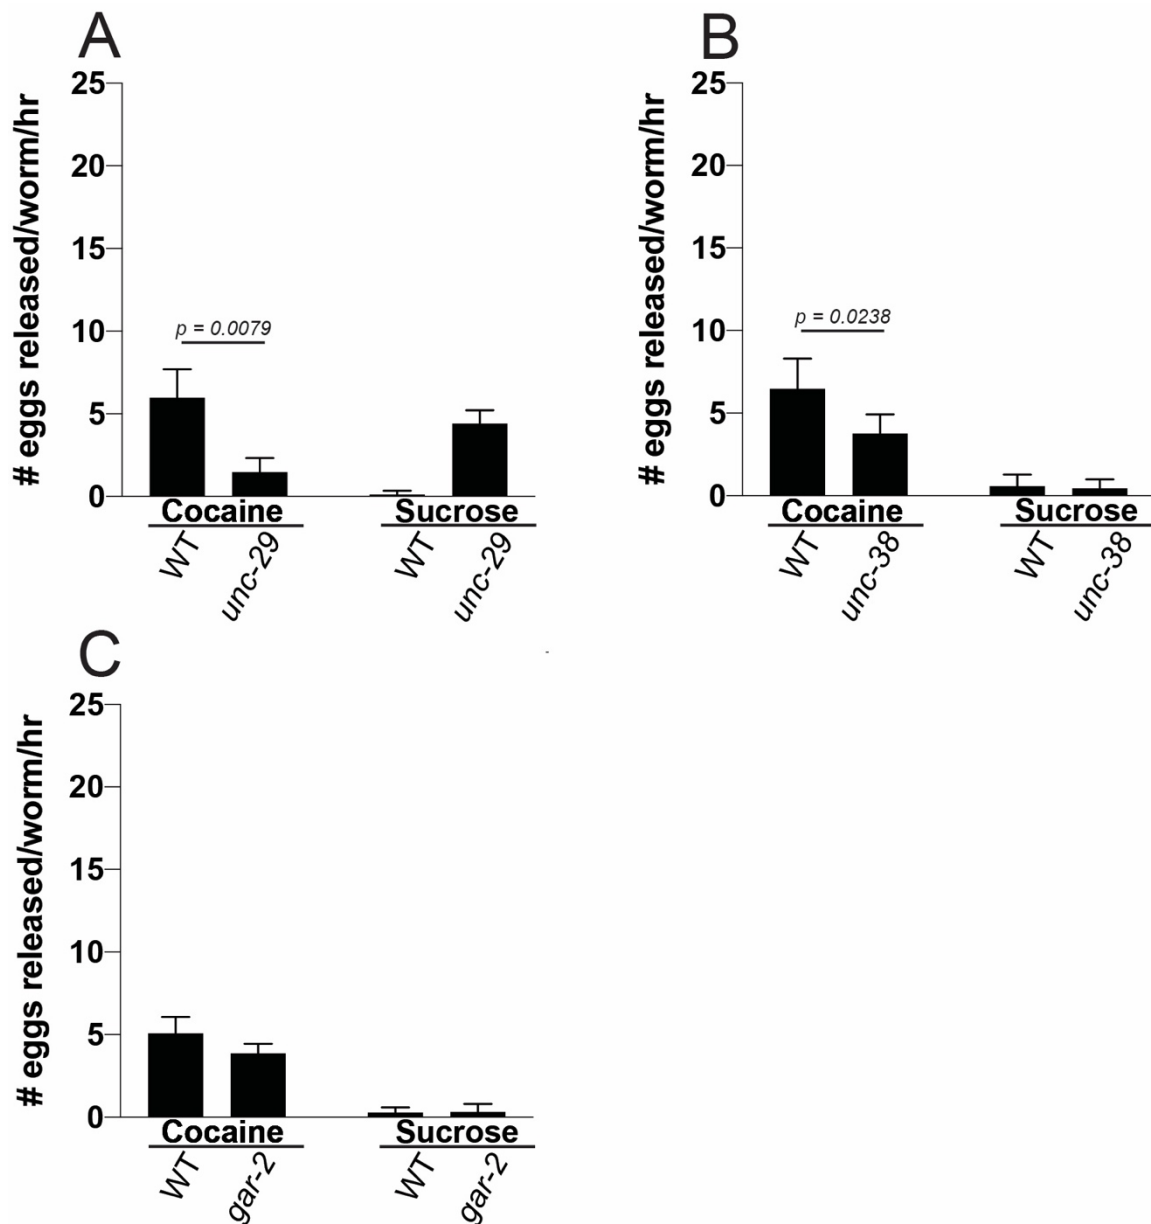

**Fig 3: nAChRs are required for the egg laying response to cocaine.** Egg laying behavior of **A.** *unc-29*, **B.** *unc-38*, and **C.** *gar-2* in 62.5 mM cocaine or a 62.5 mM sucrose control compared to WT. We performed 5 independent experiments with 10 animals in each group. Relevant p values shown for significant differences. Error bars represent SD. Significance as compared to WT control was determined via a Mann-Whitney U-test.

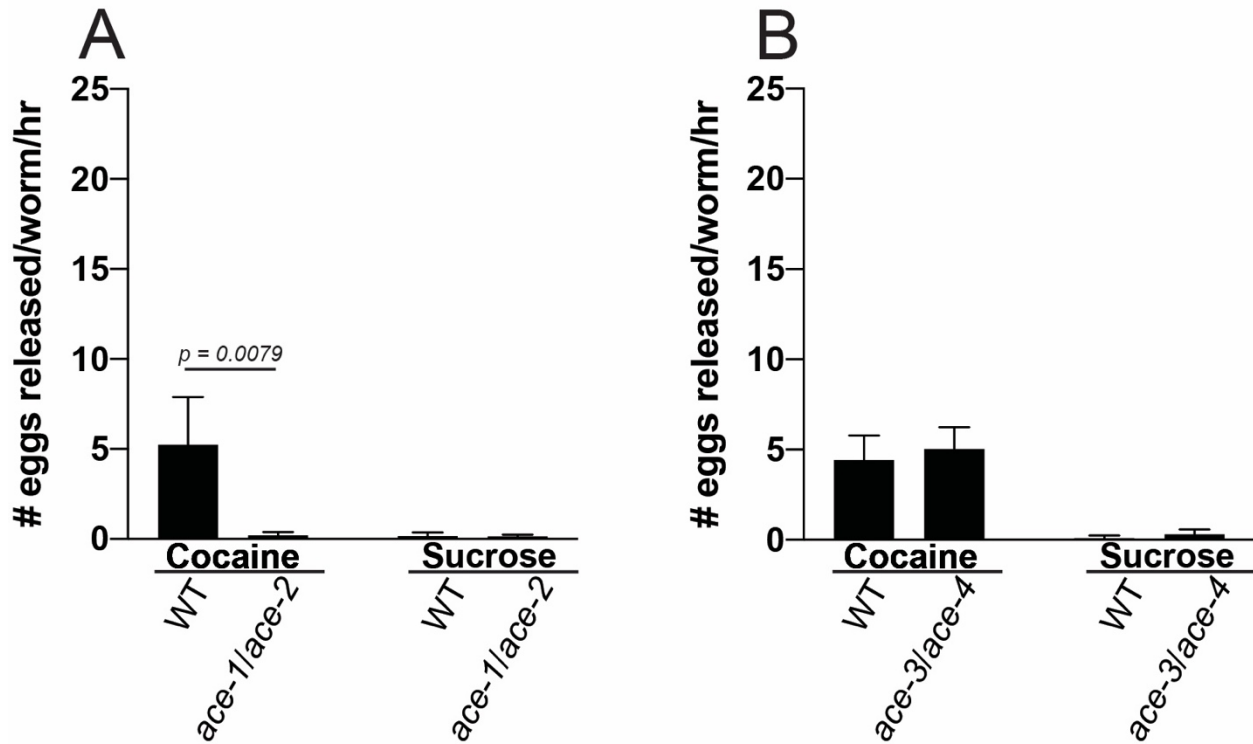

**Fig 4: nAChRs are required for the egg laying response to cocaine.** Egg laying behavior of **A.** *ace-1;ace-2* and **B.** *ace-3;ace-4* in 62.5 mM cocaine or a 62.5 mM sucrose control compared to WT. We performed 5 independent experiments with 10 animals in each group. Relevant p values shown for significant differences. Error bars represent SD. Significance as compared to WT control was determined via a Mann-Whitney U-test.

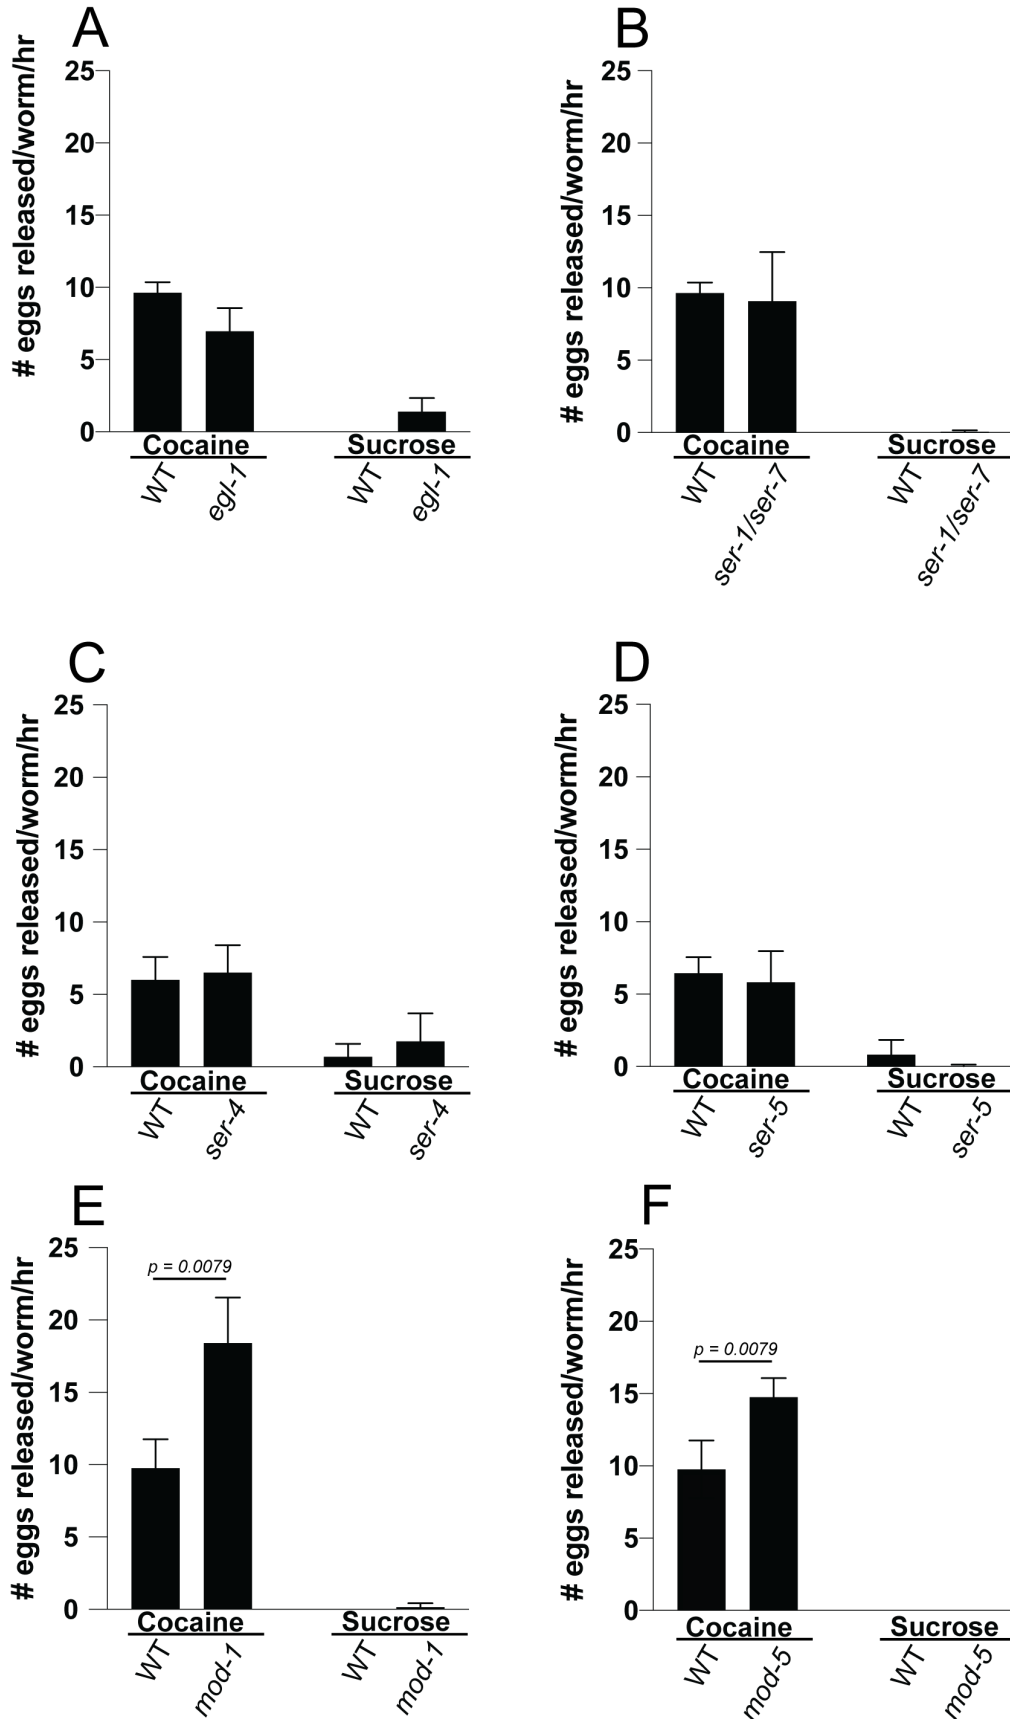

**Fig 5: Neither the HSNs nor serotonin receptors are required for the egg laying response to cocaine.** Egg laying behavior of **A.** *egl-1*, **B.** *ser-1;ser-7*, **C.** *ser-4*, **D.** *ser-5*, **E.** *mod-1*, and **F.** *mod-5* in 62.5 mM cocaine or a 62.5 mM sucrose control compared to WT. We performed 5 independent experiments with 10 animals in each group for assays of *ser-4*, *ser-5*, *mod-1*, and *mod-5* egg laying. We performed 4 independent experiments with 10 animals in each group for assays of *egl-1* and *ser-1;ser-7* egg laying. Relevant p values shown for significant differences. Error bars represent SD. Significance as compared to WT control was determined via a Mann-Whitney U-test.
